# Supplementary material for: Schizophrenia Polygenic Risk Score as a Predictor of Antipsychotic Efficacy in First-Episode Psychosis
Source: Atypon-hosted journal article supplement (doi:10.1176/appi.ajp.2018.17121363), 2018-11-05
Supplement: appi.ajp.2018.17121363.ds001.pdf [file appi.ajp.2018.17121363.ds001.pdf]

**Supplemental Table S1. p values associated with PRS with different p value thresholds predicting antipsychotic efficacy in each cohort.**

| PRS pT     | 5×10 <sup>-8</sup> | 0.001 | 0.01  | 0.05  | 0.10  | 0.20  | 0.50  |
|------------|--------------------|-------|-------|-------|-------|-------|-------|
| ZHH Old FE | 0.54               | 0.28  | 0.013 | 0.031 | 0.024 | 0.028 | 0.028 |
| EUFEST     | 0.61               | 0.26  | 0.012 | 0.050 | 0.041 | 0.012 | 0.014 |
| PAFIP      | 0.58               | 0.13  | 0.006 | 0.017 | 0.025 | 0.068 | 0.150 |
| CIDAR      | 0.94               | 0.21  | 0.96  | 0.73  | 0.22  | 0.24  | 0.18  |

**Supplemental Table S2. Secondary analysis of response rate in each cohort, separated by Caucasians and non-Caucasians. Low versus high PRS classifications were median split within each cohort or subcohort.**

|            | Reported Full Sample |                    | Caucasians         |                   | Non-Caucasians   |                  |
|------------|----------------------|--------------------|--------------------|-------------------|------------------|------------------|
|            | Low PRS              | High PRS           | Low PRS            | High PRS          | Low PRS          | High PRS         |
| ZHH Old FE | 57.9%<br>(22/38)     | 51.3%<br>(20/39)   | 60.0% (6/10)       | 44.4% (4/9)       | 62.1%<br>(18/29) | 48.3%<br>(14/29) |
| EUFEST     | 65.7%<br>(46/70)     | 42.3%<br>(30/71)   | 65.7%<br>(46/70)   | 42.3%<br>(30/71)  | 80.0% (4/5)      | 50.0% (2/4)      |
| PAFIP      | 58.9%<br>(56/95)     | 48.5%<br>(47/97)   | 58.9%<br>(56/95)   | 48.5%<br>(47/97)  | NA               | NA               |
| CIDAR      | 60.0%<br>(30/50)     | 74.0%<br>(37/50)   | 61.1%<br>(11/18)   | 70.6%<br>(12/17)  | 64.5%<br>(20/31) | 72.7%<br>(24/33) |
| Total      | 60.9%<br>(154/253)   | 52.1%<br>(134/257) | 61.7%<br>(119/193) | 47.9%<br>(93/194) | 64.6%<br>(42/65) | 60.6%<br>(40/66) |
