# Supplementary material for: Schizophrenia Polygenic Risk Score as a Predictor of Antipsychotic Efficacy in First-Episode Psychosis
Source: Atypon-hosted journal article supplement (doi:10.1176/appi.ajp.2018.17121363), 2018-11-05
Supplement: appi.ajp.2018.17121363.ds001.pdf [file appi.ajp.2018.17121363.ds001.pdf]

 


Psychiatry Online
